# Supplementary material for: Detection of blood‐brain barrier dysfunction using advanced imaging methods to predict seizures in dogs with meningoencephalitis of unknown origin
Source: PubMed Central journal article supplement — J Vet Intern Med. 2022 Mar 14;36(2):702–12. doi: 10.1111/jvim.16396 (PMC8965229; doi:10.1111/jvim.16396), 2022-03-14
Supplement: JVIM-36-702-s001.pdf [file JVIM-36-702-s001.pdf]

**Supplemental Table 1.** MRI findings (T2- and T1-weighted, FLAIR, and post-contrast T1) in MUO cases that underwent SEA (cases 1-32) and DCE (cases 33-40) analysis

| Case no. | T2                                                     | T1   | Post-contrast T1                                                                           | FLAIR                                                | General remarks                | NBBB/BBBD |
|----------|--------------------------------------------------------|------|--------------------------------------------------------------------------------------------|------------------------------------------------------|--------------------------------|-----------|
| 1*       | Hyperintensity multiple sites thalamus                 | None | Negative                                                                                   | Hyperintensity multiple sites thalamus               | None                           | NBBB      |
| 2        | Hyperintensity ependymal hyperintensity                |      | Ependymal / periventricular enhancement+ single focus of parenchymal enhancement           | Hyperintensity periventricular & white matter        | Ventricle enlargement<br>++    | BBBD      |
| 3        | None                                                   | None | None                                                                                       | None                                                 | Ventricular enlargement<br>++  | NBBB      |
| 4*       | Hyperintensity white matter and gray/white matter zone | None | Mild periventricular enhancement<br><br>Mild enhanced area one side gray/white matter zone | Hyperintensity white matter & gray/white matter zone | None                           | NBBB      |
| 5*       | Hyperintense C1& medulla                               | None | None                                                                                       | Hyperintense C1 & medulla                            | Ventricular asymmetry<br>(L>R) | NBBB      |

|     |                                                                                                       |      |                                                             |                                                                                                       |                              |      |
|-----|-------------------------------------------------------------------------------------------------------|------|-------------------------------------------------------------|-------------------------------------------------------------------------------------------------------|------------------------------|------|
| 6   | None                                                                                                  | None | None                                                        | None                                                                                                  | Ventricular enlargement +    | NBBB |
| 7   | Hyperintensity multiple small foci in both hemispheres                                                | None | None                                                        | Hyperintensity multiple small foci in both hemispheres                                                | Ventricular enlargement +++  | BBBD |
| 8   | None                                                                                                  | None | None                                                        | None                                                                                                  | None                         | BBBD |
| 9   | None                                                                                                  | None | None                                                        | None                                                                                                  | Non                          | NBBB |
| 10  | None                                                                                                  | None | None                                                        | None                                                                                                  | Ventricular asymmetry        | NBBB |
| 11* | Symmetrical white matter hyperintensity & one focus of hyperintensity in gray/white zone R hemisphere | None | One small focus of enhancement in the right prefrontal area | Symmetrical white matter hyperintensity & one focus of hyperintensity in gray/white zone R hemisphere | None                         | NBBB |
| 12  | None                                                                                                  | None | None                                                        | None                                                                                                  | Ventricular asymmetry        | NBBB |
| 13  | Hyperintensity thalamus & white matter both sides                                                     | None | None                                                        | Hyperintensity thalamus & white matter, both sides                                                    | Slight ventricular asymmetry | BBBD |
| 14  | None                                                                                                  | None | None                                                        | None                                                                                                  | None                         | NBBB |
| 15  | None                                                                                                  | None | None                                                        | None                                                                                                  | None                         | NBBB |

|     |                                                        |      |                                               |                                                        |                               |      |
|-----|--------------------------------------------------------|------|-----------------------------------------------|--------------------------------------------------------|-------------------------------|------|
| 16  | Hyperintensity white matter & thalamus, both sides     | None | Foci of thalamus and white matter enhancement | Hyperintensity white matter & thalamus, both sides     | Ventricular asymmetry         | BBBD |
| 17  | None                                                   | None | None                                          | None                                                   | None                          | NBBB |
| 18  | Hyperintensity white matter & hippocampus              | None | None                                          | Hyperintensity white matter & hippocampus              | Minimal ventricular asymmetry | BBBD |
| 19  | Hyperintensity white matter, thalamus, midbrain & pons | None | Enhancement in thalamus midbrain              | Hyperintensity white matter, thalamus, midbrain & pons | Ventricular enlargement +++   | BBBD |
| 20  | None                                                   | None | None                                          | None                                                   | None                          | BBBD |
| 21  | None                                                   | None | None                                          | None                                                   | None                          | BBBD |
| 22  | Hyperintensity hippocampus & piriform lobe             | None | Enhancement of one piriform                   | Hyperintensity hippocampus & piriform lobe             | Ventricular asymmetry         | BBBD |
| 23* | Cortical hyperintensity one side                       | None |                                               | Cortical hyperintensity one side                       | None                          | NBBB |
| 24  | None                                                   | None | None                                          | None                                                   | Ventricular enlargement ++    | BBBD |
| 25  | None                                                   | None | None                                          | None                                                   | None                          | NBBB |
| 26  | None                                                   | None | None                                          | None                                                   | Ventricular enlargement ++    | BBBD |

|    |                                                                             |                                                                        |                                                   |                                                               |                                           |      |
|----|-----------------------------------------------------------------------------|------------------------------------------------------------------------|---------------------------------------------------|---------------------------------------------------------------|-------------------------------------------|------|
| 27 | None                                                                        | None                                                                   | None                                              | None                                                          | Ventricular enlargement +++ and asymmetry | BBBD |
| 28 | Hyperintensity in the thalamus                                              | Hypointensity in the thalamus                                          | Enhancement in the thalamus                       | Hyperintensity in the thalamus                                | Ventricular enlargement +                 | BBBD |
| 29 | Patches of cortical hyperintensity                                          | None                                                                   | Small patches of cortical enhancement             | Patches of cortical hyperintensity                            | None                                      | BBBD |
| 30 | Diffused hyperintensity in white matter & round mass in one left hemisphere | Diffused hypointensity in white matter of left hemisphere & round mass | Patchy enhancement of the mass in left hemisphere | One hemisphere 11 hyperintensity in white matter + round mass | None                                      | BBBD |
| 31 | One region of hyperintensity in right occipital lobe                        | None                                                                   | One region of enhancement in right occipital lobe | One region of hyperintensity in the right occipital lobe      | Ventricular enlargement ++++              | BBBD |
| 32 | None                                                                        | None                                                                   | None                                              | None                                                          | Ventricular asymmetry                     | NBBB |
| 33 | None                                                                        | None                                                                   | None                                              | None                                                          | Ventricular enlargement ++                | NBBB |
| 34 | None                                                                        | None                                                                   | None                                              | None                                                          | None                                      | NBBB |
| 35 | Cortical hyperintensity                                                     | None                                                                   | None                                              | Cortical hyperintensity                                       | Ventricular asymmetry                     | BBBD |
| 36 | None                                                                        | None                                                                   | None                                              | None                                                          | None                                      | NBBB |

|    |                                                             |      |      |                                                             |                                           |      |
|----|-------------------------------------------------------------|------|------|-------------------------------------------------------------|-------------------------------------------|------|
| 37 | None                                                        | None | None | None                                                        | Ventricular enlargement +++               | NBBB |
| 38 | Hyperintensity in the midbrain                              | None | None | Hyperintensity in the midbrain                              | None                                      | BBBD |
| 39 | Hyperintensity of white matter in the right prefrontal area | None | None | Hyperintensity of white matter in the right prefrontal area | Ventricular enlargement +++ and asymmetry | BBBD |
| 40 | None                                                        | None | None | None                                                        | Ventricular enlargement +++               | NBBB |

\* Dog classified with NBBB had qualitative abnormalities detected by radiologists, NBBB – Normal blood brain barrier, BBBD – Blood brain barrier disruption.
